# Supplementary material for: The swelling-induced fractionation strategy to mediate cellulose availability and lignin structural integrity
Source: Royal Society of Chemistry journal article supplement (doi:10.1039/d4cc05153j), 2025-01-01
Supplement: d4cc05153j1.pdf [file d4cc05153j1.pdf]

## Supporting Information

### **The swelling-induced fractionation strategy to mediate cellulose availability and lignin structural integrity**

Dong Tian,<sup>\*a</sup> Yu Zhang,<sup>a</sup> Tingjiao Wang,<sup>a</sup> Baiheng Jiang,<sup>a</sup> Miao Liu,<sup>a</sup> Li Zhao,<sup>a</sup> Jinguang Hu,<sup>b</sup> and Fei Shen,<sup>\*a</sup>

a: College of Environment Science, Sichuan Agricultural University, Chengdu, Sichuan 611130, PR China.

E-mail: dongtian@sicau.edu.cn (D. Tian), fishen@sicau.edu.cn (F. Shen).

b: Department of Chemical and Petroleum Engineering, University of Calgary, 2500 University Dr. NW, Calgary, AB T2N 1N4, Canada.

### Experimental Section

#### Alkaline deep eutectic solvents (DES) preparation

Bagasse sample was pretreated by different concentrations of choline hydroxide-ethylene glycol (Ch-Ely) and choline hydroxide-urea (Ch-Ur) DESs, respectively. For the synthesis of these two DESs, the aqueous choline hydroxide was mixed with Ely and Ur at the molar ratio of 1:2 and stirred at 60–70 °C until transparent solutions were obtained. The concentrations of the prepared alkaline DES were adjusted to 10%, 20%, 30% and 40% with distilled water.

#### Alkaline deep eutectic solvents fractionation bagasse

20 g (based on dry weight) bagasse and 400 g aqueous DES solution were conducted at 130 °C for 3 h. The reaction mixtures were then cooled to 80 °C, after which 100 mL of 50% (by volume) ethanol/water solution was added to facilitate the filtration. The resulting cellulose-rich substrates were obtained by washing twice with hot water of 200 mL to remove the residual DESs and lignin. The collected DES filtrate was sequentially precipitated by hydrochloric acid and ethanol to gain the LCCs and xylan fractions. The obtained LCCs and xylan were freeze-dried and stored in a desiccator for further use.

#### Characterization

### **Enzymatic accessibility assessment of cellulose fractions.**

The chemical composition of the obtained products were determined by the Klason protocol according to TAPPI Standard Method T-222.<sup>1</sup> X-ray diffraction patterns (XRD) of bagasse and cellulose solids were obtained on a Rigaku Ultima IV in Japan using a scanning range of 5–80° and a speed of 5° min<sup>-1</sup>. The crystallinity index (CrI) of the sample was calculated based on Segal's method.<sup>2</sup> The degree of polymerization (DP) of cellulose solid was obtained based on its intrinsic viscosity values. Briefly, the lignin residues in cellulose solids were first removed with mixed solution of sodium chlorite and acetic acid, and then the solid substrates were dissolved in the copper ethylenediamine solution using an Ubbelohde viscometer according to ASTM D1795.28.<sup>3</sup> Water retention values (WRV) of bagasse and cellulose-rich solids were evaluated by TAPPI-256.<sup>4</sup> Enzymatic hydrolyses of the original bagasse and cellulose-rich materials were performed with a solid loading of 5% and a cellulase (Cellic CTec2) loading of 20 mg g<sup>-1</sup> in sodium acetate buffer (50 mM, pH 4.8). Then, the mixtures were incubated at 50 °C with 150 rpm for 96 h in a benchtop orbital shaker (ZWYR-2102C Shanghai, China). In the specific time points, 500 µL of hydrolysate was taken in the specific time and incubated on a 105 °C hot plate for 10 min to inactivate the cellulase. After that, the glucose supernatant was collected by centrifuging the solution, which was analyzed by high-performance liquid chromatography (HPLC).

### **LCC and xylan characterization**

The <sup>13</sup>C and 2D-HSQC NMR were recorded using a Bruker AVII 600 MHz spectrometer. 100 mg freeze-dried samples were dissolved in 0.7 mL DMSO-d<sub>6</sub>, and 0.1 mL Cr (III) acetylacetonate (10 µmol mL<sup>-1</sup>, DMSO-d<sub>6</sub>) was added to the mixed solution to completely relax all nuclei. The configuration solution was then transferred to a 5 mm NMR tube. Then NMR were analyzed using MestReNova9 software and compared with the literature.<sup>5</sup> The subunit contents and chemical linkage contents of LCCs were calculated as follows.

$$I_X\% = I_X / (0.5I_{S_{2,6}} + I_{G_2} + 0.5I_{H_{2,6}}) \quad (1)$$

where I represented the integration of the corresponding signal peak in the 2D-HSQC spectra.

The phenolic hydroxyl content in LCC was determined using the Folin-Ciocalteu method as described in the literature<sup>6</sup>. Thermogravimetric analysis (TGA) was conducted on a thermogravimetric analyzer (NETZSCH TG 209 F1, Germany). The sample was heated at a rate of 10 °C min<sup>-1</sup>, and the temperature ranged from room temperature to 800°C under a nitrogen atmosphere.

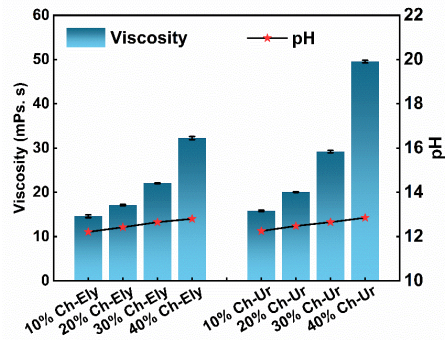

**Fig. S1.** Physical properties of ChOH-based alkaline DES.

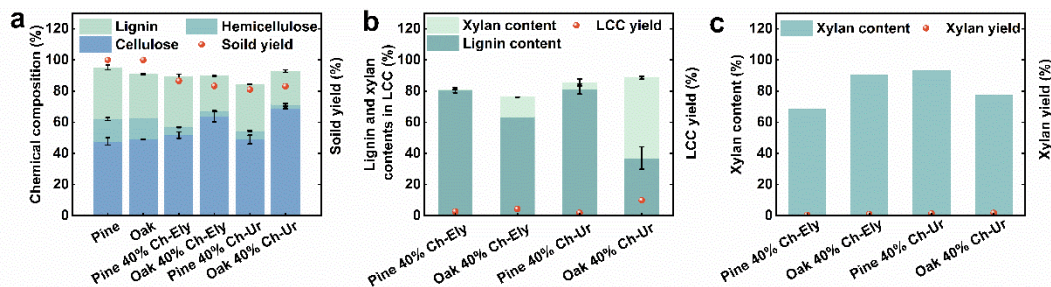

**Fig. S2** (a) Chemical composition and solid recovery of bagasse. (b) Chemical compositions and yields of LCC fraction. (c) Purity and yields of xylan fraction.

(Reaction conditions were 40% Ch-Ely and 40% Ch-Ur at 130°C for 3h.)

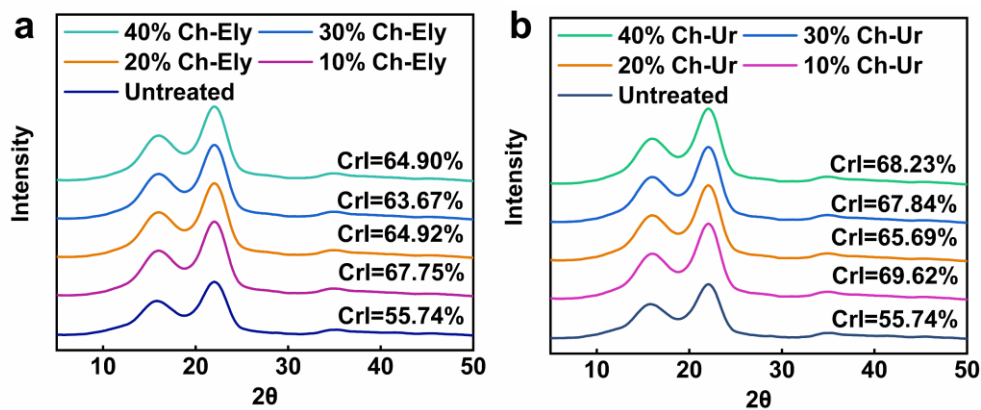

**Fig. S3** X-ray diffraction patterns of cellulose fractions pretreated with (a) ChOH-Ethylene glycol and (b) ChOH-Urea, respectively.

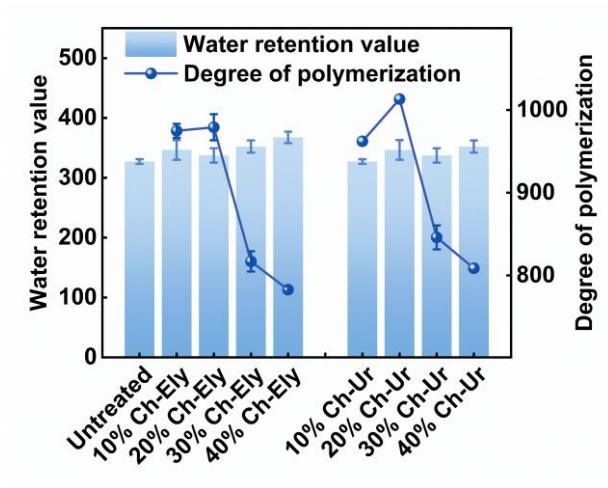

**Fig. S4** Water retention value and degree of polymerization of untreated and pretreated samples

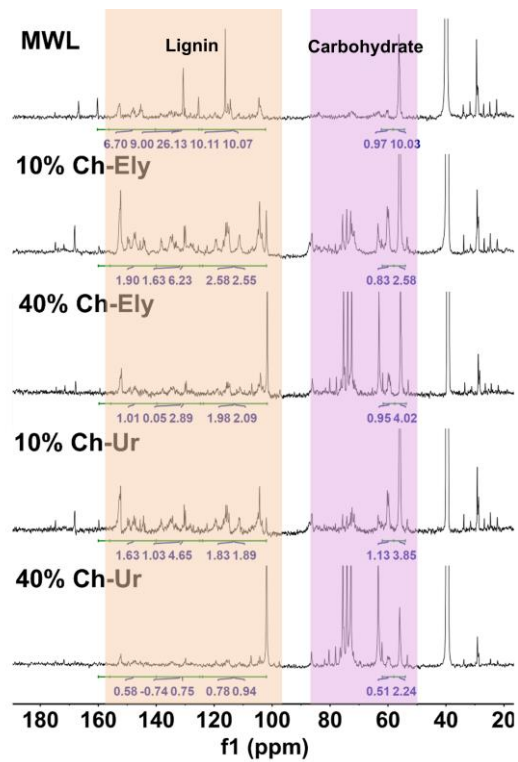

**Fig. S5** LCC semi-quantitative <sup>13</sup>C NMR.

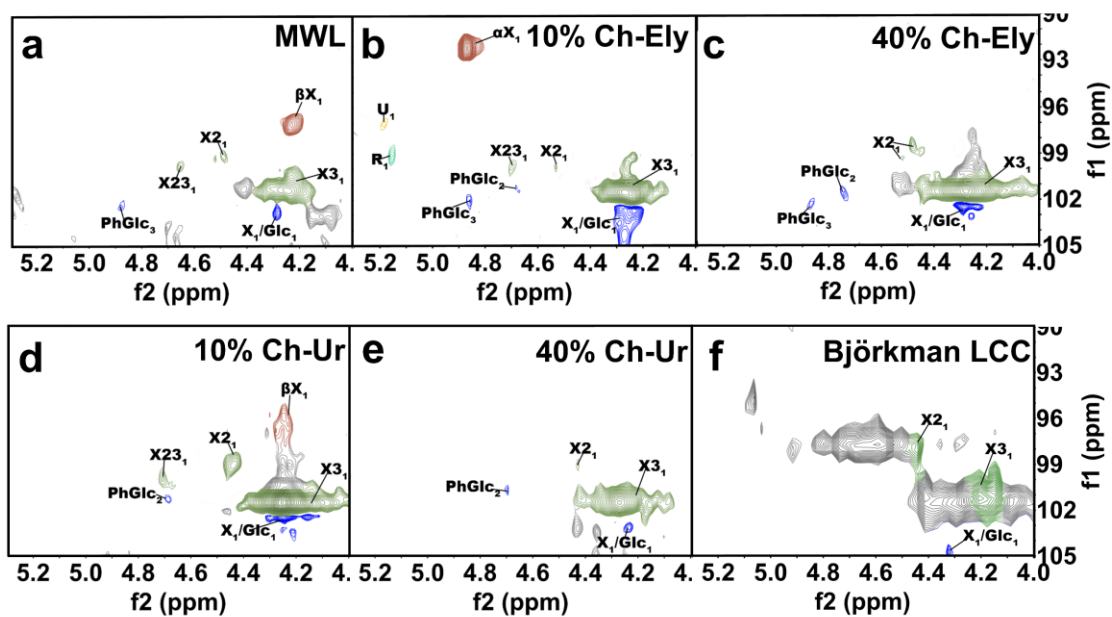

**Fig S6** Partially amplified signals, PhGlc ( $\delta C/\delta H$  105–100/5.5–4.5 ppm) for different LCCs in the HSQC NMR spectra, (a) MWL, (b) 10% Ch-Ely, (c) 40% Ch-Ely, (d) 10% Ch-Ur, (e) 40% Ch-Ur. (f) Björkman LCC.

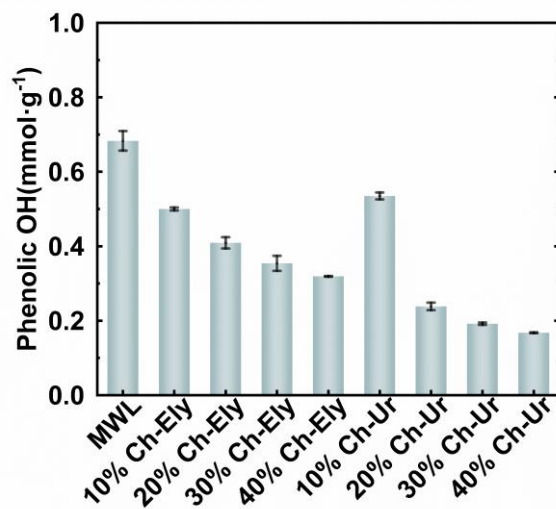

**Fig. S7** Phenolic hydroxyl group content of LCC and MWL calculated by Folin-Ciocalteu method.

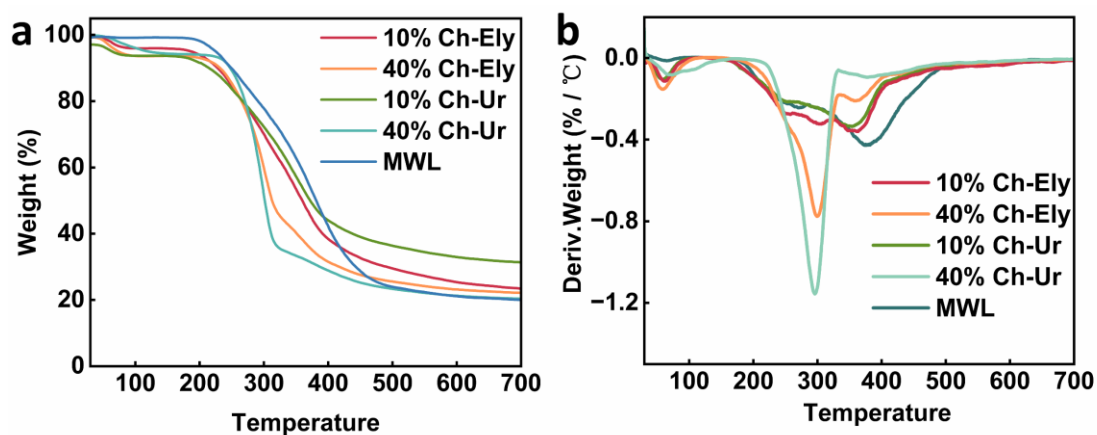

**Fig. S8** (a) Typical thermogravimetric analysis (TGA) curves. (b) Differential thermogravimetric (DTG) curves.

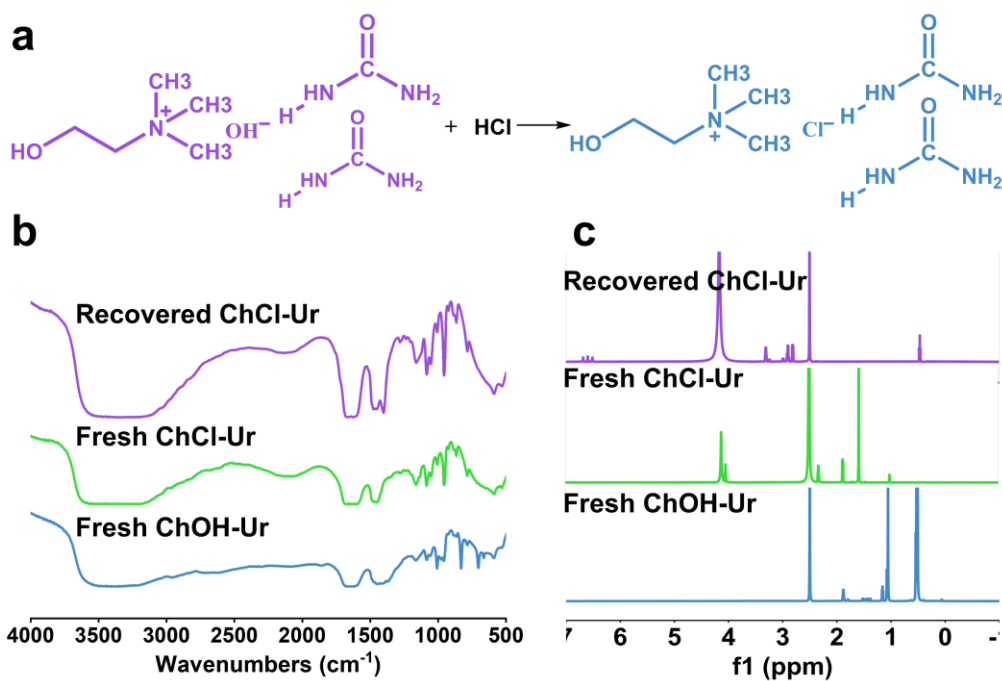

**Fig. S9** (a) DES structure change after LCC separation, (b) FTIR and (c) <sup>1</sup>H NMR spectra of fresh ChOH-Ur, recovered ChCl-Ur and fresh ChCl-Ur.

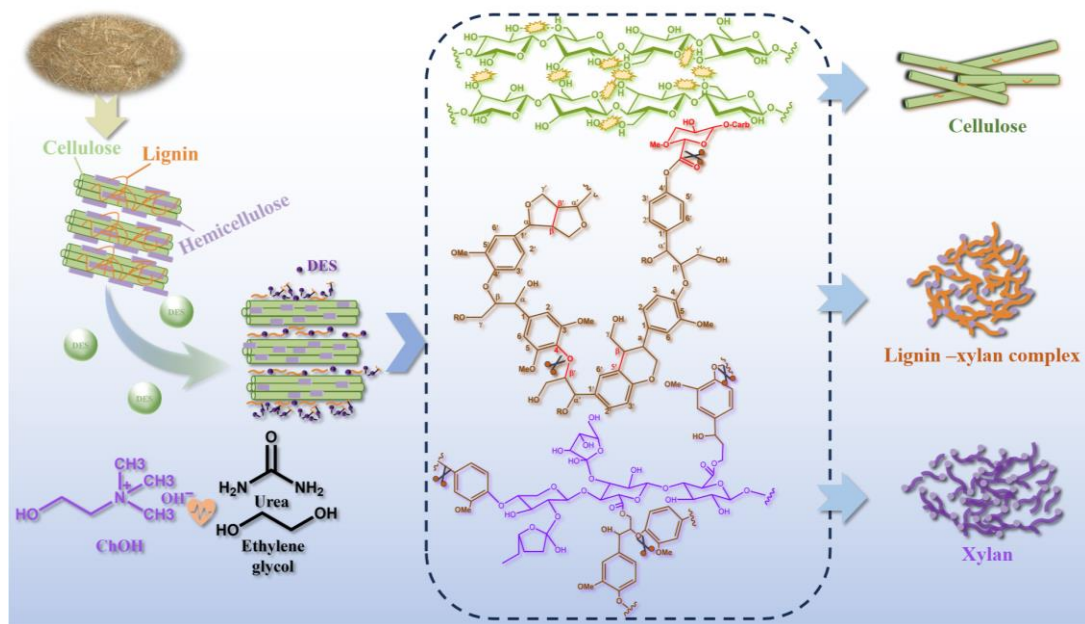

**Fig. S10** mechanism of the tailored swelling-induced fractionation lignocellulose strategy.



Table. S1 HPLC raw data for substrate composition analysis. The chemical composition was determined according to the Klason protocol (TAPPI standard method T-222).

| Untreated-1  |           |             |            |                 |             |      |
|--------------|-----------|-------------|------------|-----------------|-------------|------|
| Time         | Peak area | Peak height | Peak width | Symmetry factor | Peak area % | Type |
| 9.908        | 28000.7   | 1557.7      | 0.2788     | 0.888           | 1.058       | VB R |
| 11.123       | 87506.9   | 4641.1      | 0.2934     | 0.829           | 3.308       | BV   |
| 11.697       | 45789.6   | 2388.4      | 0.3014     | 0.833           | 1.731       | VB   |
| Untreated-2  |           |             |            |                 |             |      |
| Time         | Peak area | Peak height | Peak width | Symmetry factor | Peak area % | Type |
| 9.908        | 29114.1   | 1615.4      | 0.2794     | 0.886           | 1.085       | VB R |
| 11.124       | 88226.5   | 4770.2      | 0.2914     | 0.794           | 3.288       | BV   |
| 11.696       | 47900.1   | 2470.2      | 0.3018     | 0.822           | 1.785       | VV R |
| 40% ChOH-1   |           |             |            |                 |             |      |
| Time         | Peak area | Peak height | Peak width | Symmetry factor | Peak area % | Type |
| 10.268       | 23760.09  | 871         | 0.3677     | 0.835           | 0.677       | VBAE |
| 11.425       | 86705     | 5913.6      | 0.3878     | 0.864           | 4.613       | MM   |
| 12.967       | 3282      | 24          | 0.3166     | 0.29            | 0.019       | BB   |
| 40% ChOH-2   |           |             |            |                 |             |      |
| Time         | Peak area | Peak height | Peak width | Symmetry factor | Peak area % | Type |
| 10.222       | 22229     | 806.3       | 0.3463     | 0.806           | 0.65        | VBAE |
| 11.35        | 82933     | 43.9        | 0.2359     | 1.414           | 0.023       | BB   |
| 11.968       | 2156      | 2023.1      | 0.348      | 0.805           | 1.555       | MM   |
| 10% Ch-Ely-1 |           |             |            |                 |             |      |
| Time         | Peak area | Peak height | Peak width | Symmetry factor | Peak area % | Type |
| 9.917        | 29041.4   | 1579.3      | 0.2858     | 0.837           | 1.166       | VB R |
| 11.135       | 146889    | 7844.2      | 0.2941     | 0.79            | 5.899       | BV   |
| 11.705       | 31116.5   | 1601.6      | 0.3001     | 0.805           | 1.25        | VV R |
| 10% Ch-Ely-2 |           |             |            |                 |             |      |
| Time         | Peak area | Peak height | Peak width | Symmetry factor | Peak area % | Type |
| 9.917        | 29913.5   | 1611        | 0.2861     | 0.839           | 1.111       | VV R |
| 11.135       | 131393.3  | 7101        | 0.2915     | 0.787           | 4.881       | BV   |
| 11.708       | 61397.6   | 3154.2      | 0.3027     | 0.819           | 2.281       | VV R |

Continued Table

| 20% Ch-Ely-1 |           |             |            |                 |             |      |
|--------------|-----------|-------------|------------|-----------------|-------------|------|
| Time         | Peak area | Peak height | Peak width | Symmetry factor | Peak area % | Type |
| 9.918        | 29028.8   | 1562.1      | 0.2865     | 0.841           | 1.084       | VV R |
| 11.136       | 138721.1  | 7500.9      | 0.2892     | 0.785           | 5.18        | BV   |
| 11.709       | 56142.2   | 2874.5      | 0.3035     | 0.813           | 2.096       | VV R |
| 20% Ch-Ely-2 |           |             |            |                 |             |      |
| Time         | Peak area | Peak height | Peak width | Symmetry factor | Peak area % | Type |
| 9.918        | 29039.2   | 1566.2      | 0.2858     | 0.84            | 1.083       | VV R |
| 11.137       | 139195    | 7525.4      | 0.2914     | 0.785           | 5.193       | BV   |
| 11.71        | 54807.3   | 2851.7      | 0.2998     | 0.838           | 2.045       | VB   |
| 30% Ch-Ely-1 |           |             |            |                 |             |      |
| Time         | Peak area | Peak height | Peak width | Symmetry factor | Peak area % | Type |
| 9.917        | 29335.4   | 1573.1      | 0.2871     | 0.819           | 1.073       | VV R |
| 11.135       | 150469.3  | 8112.6      | 0.292      | 0.782           | 5.503       | BV   |
| 11.708       | 51681.4   | 2650.9      | 0.3031     | 0.817           | 1.89        | VV R |
| 30% Ch-Ely-2 |           |             |            |                 |             |      |
| Time         | Peak area | Peak height | Peak width | Symmetry factor | Peak area % | Type |
| 9.915        | 29143.2   | 1591        | 0.285      | 0.829           | 1.075       | VV R |
| 11.133       | 148724.5  | 8022.8      | 0.2919     | 0.783           | 5.486       | BV   |
| 11.706       | 50876     | 2606.4      | 0.3033     | 0.813           | 1.877       | VV R |
| 40% Ch-Ely-1 |           |             |            |                 |             |      |
| Time         | Peak area | Peak height | Peak width | Symmetry factor | Peak area % | Type |
| 9.915        | 28854.3   | 1582.8      | 0.2809     | 0.789           | 0.823       | VV R |
| 11.133       | 154317.9  | 8333.1      | 0.2895     | 0.78            | 4.403       | BV   |
| 11.706       | 45072.4   | 2309.3      | 0.3012     | 0.81            | 1.286       | VV R |
| 40% Ch-Ely-2 |           |             |            |                 |             |      |
| Time         | Peak area | Peak height | Peak width | Symmetry factor | Peak area % | Type |
| 9.911        | 29920.1   | 1626.3      | 0.2859     | 0.798           | 1.11        | VV R |
| 11.129       | 153642.3  | 8291.7      | 0.2918     | 0.782           | 5.7         | BV   |
| 11.701       | 45015.9   | 2341.8      | 0.2999     | 0.834           | 1.67        | VB   |

## Continued Table

| 10% Ch-Ur-1 |           |             |            |                 |             |      |
|-------------|-----------|-------------|------------|-----------------|-------------|------|
| Time        | Peak area | Peak height | Peak width | Symmetry factor | Peak area % | Type |
| 9.909       | 30057.7   | 1615.5      | 0.2862     | 0.811           | 1.125       | VB R |
| 11.125      | 150534.5  | 8124.1      | 0.2918     | 0.781           | 5.636       | BV   |
| 11.697      | 49686.4   | 2546.1      | 0.3011     | 0.817           | 1.86        | VV R |
| 10% Ch-Ur-2 |           |             |            |                 |             |      |
| Time        | Peak area | Peak height | Peak width | Symmetry factor | Peak area % | Type |
| 9.907       | 28761.2   | 1565.2      | 0.2857     | 0.83            | 1.054       | VV R |
| 11.123      | 152543.8  | 8245.9      | 0.2914     | 0.781           | 5.59        | BV   |
| 11.695      | 50640     | 2597.3      | 0.3031     | 0.813           | 1.856       | VV R |
| 20% Ch-Ur-1 |           |             |            |                 |             |      |
| Time        | Peak area | Peak height | Peak width | Symmetry factor | Peak area % | Type |
| 9.907       | 28525.6   | 1553.9      | 0.2855     | 0.855           | 1.044       | VV R |
| 11.124      | 133321.7  | 7216.6      | 0.2911     | 0.787           | 4.877       | BV   |
| 11.697      | 61423.1   | 3150.7      | 0.303      | 0.815           | 2.247       | VV R |
| 20% Ch-Ur-2 |           |             |            |                 |             |      |
| Time        | Peak area | Peak height | Peak width | Symmetry factor | Peak area % | Type |
| 9.905       | 29410.9   | 1592        | 0.2847     | 0.848           | 1.095       | VV R |
| 11.121      | 131487.1  | 7108.8      | 0.2892     | 0.783           | 4.895       | BV   |
| 11.694      | 60665     | 3113.6      | 0.3029     | 0.815           | 2.258       | VV R |
| 30% Ch-Ur-1 |           |             |            |                 |             |      |
| Time        | Peak area | Peak height | Peak width | Symmetry factor | Peak area % | Type |
| 9.905       | 28962     | 1564.3      | 0.2851     | 0.808           | 1.051       | VB R |
| 11.122      | 161046.5  | 8660        | 0.2926     | 0.777           | 5.845       | BV   |
| 11.693      | 40440.1   | 2066.3      | 0.3018     | 0.804           | 1.468       | VV R |
| 30% Ch-Ur-2 |           |             |            |                 |             |      |
| Time        | Peak area | Peak height | Peak width | Symmetry factor | Peak area % | Type |
| 9.908       | 28758.7   | 1553.1      | 0.2873     | 0.811           | 1.061       | VV R |
| 11.124      | 162040.7  | 8711.1      | 0.2926     | 0.779           | 5.979       | BV   |
| 11.695      | 40513.1   | 2069.6      | 0.3018     | 0.805           | 1.495       | VV R |

### Continued Table

| 40% Ch-Ur-1 |           |             |            |                 |             |      |
|-------------|-----------|-------------|------------|-----------------|-------------|------|
| Time        | Peak area | Peak height | Peak width | Symmetry factor | Peak area % | Type |
| 9.902       | 28602.2   | 1547.7      | 0.2847     | 0.787           | 1.058       | VB R |
| 11.117      | 175507.6  | 9273.8      | 0.2964     | 0.748           | 6.489       | BV R |
| 11.688      | 29959     | 1616.4      | 0.2897     | 0.689           | 1.108       | VV E |
| 40% Ch-Ur-2 |           |             |            |                 |             |      |
| Time        | Peak area | Peak height | Peak width | Symmetry factor | Peak area % | Type |
| 9.905       | 29442.9   | 1587.6      | 0.2855     | 0.749           | 0.844       | VV R |
| 11.12       | 175158.2  | 9141.7      | 0.297      | 0.78            | 5.019       | BV R |
| 11.693      | 28104.8   | 1538.8      | 0.2865     | 0.713           | 0.805       | VB E |

### Reference

1. R. P. Chandra, K. Gourlay, C.-S. Kim and J. N. Saddler, *ACS Sustainable Chemistry & Engineering*, 2015, **3**, 986-991.
2. Y. Zhang, Q. Hou, W. Xu, M. Qin, Y. Fu, Z. Wang, S. Willför and C. Xu, *Industrial Crops and Products*, 2017, **108**, 864-871.
3. X.-J. Shen, T. Chen, H.-M. Wang, Q. Mei, F. Yue, S. Sun, J.-L. Wen, T.-Q. Yuan and R.-C. Sun, *ACS sustainable chemistry & engineering*, 2019, **8**, 2130-2137.
4. F. Shen, D. Tian, G. Yang, S. Deng, F. Shen, J. He, Y. Zhu, C. Huang and J. Hu, *ACS Sustainable Chemistry & Engineering*, 2020, **8**, 11253-11262.
5. F. Shen, S. Wu, M. Huang, L. Zhao, J. He, Y. Zhang, S. Deng, J. Hu, D. Tian and F. Shen, *Green Chemistry*, 2022, **24**, 5242-5254.
6. M. Pérez, I. Domínguez-López and R. M. Lamuela-Raventós, *Journal of Agricultural and Food Chemistry*, 2023, **71**, 17543-17553.
